# Supplementary material for: Solvent incorporation during N-iodosaccharin mediated glycosylation: facile synthesis of acetal linked disaccharides
Source: Royal Society of Chemistry journal article supplement (doi:10.1039/b104196g), 2001-01-01
Supplement: b104196g.doc [file b104196g.doc]

**Supplementary Material: Spectral Data**

1’-Methoxy-1’-methylethyl 2,3,4,6-tetra-*O*-benzyl--D-glucopyranoside **3**

(Rf  0.38) (ethyl acetate:petroleum ether 40-60, 1:4)

[]D22  +67 (*c*, 1.0 in CHCl3).

H (400 MHz, CDCl3) 1.31, 1.54 (6H, 2 x s, 2 x CH3), 3.24 (3H, s, OCH3), 3.56 (1H, dd, *J*1,2 3.5 Hz, *J*2,3 9.9 Hz, H‑2), 3.65 (1H, dd, *J*5,6 1.6 Hz, *J*6,6’ 10.6 Hz, H‑6), 3.76 (1H, dd, *J*5,6' 4.4 Hz, H‑6’), 3.80 (1H, at, *J*9.5 Hz, H-4), 4.17-4.20 (1H, m, H-5), 4.30 (1H, at, *J*9.4 Hz, H-3), 4.36, 4.47 (2H, ABq, *J*AB 12.0 Hz, PhCH2), 4.47, 4.51 (2H, ABq, *J*AB 12.0 Hz, PhCH2), 4.64, 4.97 (2H, ABq, *J*AB 11.3 Hz, PhCH2), 4.84, 5.02 (2H, ABq, *J*AB 11.3 Hz, PhCH2), 5.53 (1H, d, H-1), 7.03–7.33 (20H, m, Ar-H).

C (100.6 MHz, CDCl3) 25.0, 27.3 (2 x q, 2 x CH3), 49.5 (q, OCH3), 70.0 (t, C-6), 73.79, 73.80, 75.44, 75.78 (4 x t, 4 x PhCH2), 71.6, 79.2, 81.24, 82.94, 90.35 (5 x d, *C‑*5,*C‑*4, *C‑*2, *C‑*3, *C‑*1), 101.65 (s, *C‑*1’), 127.7, 127.9, 127.9, 128.0, 128.1, 128.2, 128.3, 128.5, 128.7, 128.8, 128.8, 128.85 (12 x d, Ar-CH), 139.2, 139.4, 139.7, 140.1 (4 x s, Ar-C).

m/z (ESI+) 651.15 (M + K+, 10%), 635.23 (M + Na+, 100%), 630.23 (M + NH4+, 10%).

(HRMS Calcd. for C38H48 NO7 (M + NH4+) 630.3431. Found 630.3430)

1,2:3,4-Di-*O*-isopropylidene-6-*O*-[1’-methyl-1’-(2,3,4,6-tetra-*O*-benzyl--D-glucopyranosyloxy)-ethyl]--D-galactopyranose **6**.

(Rf  0.44) (ethyl acetate:petroleum ether 40-60, 1:3).

[]D22 +12 (*c*, 1.0 in CHCl3).

H (400 MHz, CDCl3) 1.01, 1.14 (6H, 2 x s, 2 x CH3), 1.42, 1.43 (6H, 2 x s, 2 x CH3), 1.45, 1.58 (6H, 2 x s, 2 x CH3), 3.63 (1H, dd, *J*1,2 3.5 Hz, *J*2,3 9.7 Hz, H‑2glu), 3.64 (1H, dd, *J*6,6’ 10.6 Hz, *J*6,5 1.5 Hz H‑6glu), 3.73 (1H, dd, *J*6’,5 4.3 Hz, H‑6’glu), 3.75 (1H, at, *J*10.1 Hz, H-4glu), 4.05 (1H, dd, *J*6,6’ 11.8 Hz, *J*6,5 8.8 Hz, H‑6gal), 4.16-4.19 (2H, m, H-5glu, H-2gal), 4.23-4.28 (3H, m, H-5gal, H-6’gal, H-4gal), 4.29 (1H, at, *J*9.1 Hz, H-3glu), 4.38, 4.47 (2H, ABq, *J*AB 12.2 Hz, PhCH2), 4.53 (1H, dd, *J*3,2 2.4 Hz, *J*3,4 8.1 Hz, H‑3gal), 4.57, 4.83 (2H, ABq, *J*AB 11.2 Hz, PhCH2), 4.60, 4.93 (2H, ABq, *J*AB 11.2 Hz, PhCH2), 4.79, 4.99 (2H, ABq, *J*AB 11.2 Hz, PhCH2), 5.53 (1H, dd, *J*1,2 4.7 Hz, H-1gal), 5.67 (1H, d, H-1glu), 7.05 – 7.41 (20H, m, Ar-H).

C (100.6 MHz, CDCl3) 24.7, 25.1 (2 x q, 2 x CH3), 26.1, 26.6 (2 x q, 2x CH3), 26.6, 27.3 (2 x q, 2 x CH3), 61.3 (t, C-6gal), 68.0 (d, C-5gal), 70.0 (t, C-6glu), 70.4, 71.5, 71.6, 71.9 (4 x d, C-5glu, C-3gal, C-4gal, C-2gal), 73.7, 73.8, 75.4, 75.7 (4 x t, 4 x PhCH2), 79.1, 80.7, 82.8, 90.6, 97.2 (5 x d, *C‑*4glu, *C‑*2glu, *C‑*3glu, *C‑*1glu, C-1gal), 102.0 (s, *C‑*1’), 108.6, 109.3 (2 x s, 2 x Me2C), 127.6, 127.8, 127.9, 128.0, 128.1, 128.2, 128.3, 128.5, 128.6, 128.7, 128.8. 128.8, 129.1 (13 x d, Ar-CH), 139.2, 139.4, 139.7, 140.2 (4 x s, Ar-C).

m/z (APCI+) 863.53 (M + Na+, 13%), 181.09 (100%).

(HRMS Calcd. for C49H64 NO12 (M + NH4+) 858.4429. Found 858.4419).

Methyl 2-*O*-benzyl-4,6-*O*-benzylidene-3-*O*-[1’-methyl-1’-(2,3,4,6-tetra-*O*-benzyl--D-glucopyranosyloxy)ethyl]--D-mannopyranoside **8.**

(Rf  0.26) (ethyl acetate:petroleum ether 40-60, 1:4)

[]D22 +42 (*c*, 1.0 in CHCl3).

H (400 MHz, CDCl3) 1.52, 1.69 (6H, 2 x s, 2 x CH3), 2.98 (3H, s, CH3), 3.54 (1H, dd, *J*1,2 3.6 Hz, *J*2,3 9.7 Hz, H‑2glu), 3.58 (1H, dd, *J*6,6’ 10.8 Hz, *J*6,5 1.4 Hz, H‑6glu), 3.64 (1H, at, *J*10.5 Hz, H‑6man), 3.77 (1H, dd, *J*6’,5 3.9 Hz, H‑6’glu), 3.84 (1H, at, *J*9.5 Hz, H-4glu), 3.96 (1H, dt, *J*5,6 9.8 Hz, *J*5,6’ 4,8 Hz, *J*5,4 9.8 Hz, H-5man), 4.13 (1H, dd, *J*6,6' 10.5 Hz, H‑6’man), 4.18-4.21 (1H, m, H-5glu), 4.26 (1H, at, *J*9.3 Hz, H-3glu), 4.30 (1H, dd, *J*2,1 1.5 Hz, *J*2,3 3.1 Hz, H‑2man), 4.33, 4.56 (2H, ABq, *J*AB 11.7 Hz, PhCH2), 4.36 (1H, at, *J*10.1 Hz, H-4man), 4.45, 4.48 (2H, 2 x s, PhCH2), 4.66 (1H, d, H-1man), 4.66, 4.97 (2H, ABq, *J*AB 11.4 Hz, PhCH2), 4.68, 5.05 (2H, ABq, *J*AB 11.9 Hz, PhCH2), 4.75 (1H, dd, *J*3,4 10.2 Hz, H‑3man), 4.91, 5.02 (2H, ABq, *J*AB 11.5 Hz, PhCH2), 5.22 (1H, d, H-1glu), 5.37 (1H, s, PhCH-O), 6.99–7.65 (30H, m, Ar-H).

C (100.6 MHz, CDCl3) 26.4, 27.0 (2 x q, 2 x CH3), 54.7 (q, CH3), 65.5 (d, C-5man), 69.4, 69.8 (2 x t, C-6man, C-6glu), 70.9, 71.8 (2 x d, C-3man, C-5glu), 73.8, 73.8, 74.8, 75.4, 75.7 (5 x t, 5 x PhCH2), 78.3, 79.1, 80.5, 81.0, 82.8, 92.4, 101.7 (7 x d, C-4man, *C‑*4glu, *C‑*2man, C-2glu, C-3glu, C-1glu, C-1man), 102.3 (s, PhC-O), 104.6 (s, C-1’), 127.0, 127.8, 127.9, 128.0, 128.1, 128.2, 128.3, 128.4, 128.6, 128.7, 128.8, 128.8, 128.9, 129.1 (14 x d, Ar-CH), 139.2, 139.3, 139.3, 139.7, 140.1 (5 x s, Ar-C).

m/z (CI+) 970.9 (M + NH4+, 32%), 912.5 (15%), 822.4 (10%), 679.4 (28%), 558.4 (61%), 540.4 (100%), 423.4 (22%); (ESI+) 991.43 (M + K+, 13%), 975.44 (M + Na+, 100%), 970.45 (M + NH4+, 8%).

(HRMS Calcd. for C58H68NO12 (M + NH4+) 970.4742. Found 970.4750).

1’-Methoxycyclohexyl 2,3,4,6-tetra-*O*-benzyl--D-glucopyranoside **9**

(Rf  0.63) (ethyl acetate:hexane, 2:3)

[]D22  +66 (*c*, 1.0 in CHCl3)

H (400 MHz, CDCl3) 1.10-1.20 (1H, m, cyclohexyl-H), 1.28-1.62 (6H, m, cyclohexyl-H), 1.76-1.90 (2H, m, cyclohexyl-H), 2.11-2.15 (1H, m, cyclohexyl-H), 3.33 (3H, s, OCH3), 3.57 (1H, dd, *J*1,2 3.5 Hz, *J*2,3 9.9 Hz, H‑2), 3.69 (1H, dd, *J*6,6’ 10.5 Hz, *J*6,5 1.8 Hz, H‑6), 3.79 (1H, dd, *J*6’,5 4.4 Hz, H‑6’), 3.81 (1H, at, *J*9.5 Hz, H-4), 4.25-4.29 (1H, m, H-5), 4.33 (1H, at, *J*9.4 Hz, H-3), 4.36, 4.47 (2H, ABq, *J*AB 12.2 Hz, PhCH2), 4.50 (2H, s, PhCH2), 4.65, 4.98 (2H, ABq, *J*AB 11.3 Hz, PhCH2), 4.84, 5.02 (2H, ABq, *J*AB 11.3 Hz, PhCH2), 5.59 (1H, dd, H-1), 7.03–7.33 (20H, m, Ar-H).

C (100.6 MHz, CDCl3) 23.5, 23.8, 26.0, 33.5, 36.6 (5 x t, cyclohexyl-C), 48.5 (q, OCH3), 70.1 (t, C-6), 71.9 (d, C-5), 73.8, 75.5, 75.8 (3 x t, 4 x PhCH2), 79.2, 81.3, 83.0, 89.9 (4 x d, *C‑*4, *C‑*2, *C‑*3, *C‑*1), 102.3 (s, *C‑*1’), 127.7, 127.9, 128.0, 128.1, 128.2, 128.3, 128.4, 128.5, 128.7, 128.8, 128.8, 128.82 (12 x d, Ar-CH), 139.2, 139.4, 139.7, 140.1 (4 x s, Ar-C).

m/z (ESI+) 691.19 (M + K+, 17%), 675.44 (M + Na+, 100%), 415.26 (25%).

(HRMS Calcd. for C41H52 NO7 (M + NH4+) 670.3744. Found 670.3746).

1,2:3,4-Di-*O*-isopropylidene-6-*O*-[1’-cyclohexyl-1’-(2,3,4,6-tetra-*O*-benzyl--D-glucopyranosyloxy)]--D-galactopyranose **10**.

(Rf  0.63) (ethyl acetate:petroleum ether 40-60, 2:3)

[]D22 +14 (*c*, 1.0 in CHCl3).

H (400 MHz, CDCl3) 1.17-1.24, 1.44-1.63, 1.95-2.05 (10H, 3 x m, cyclohexyl-H), 1.32, 1.33 (6H, 2 x s, 2 x CH3), 1.40, 1.50 (6H, 2 x s, 2 x CH3), 3.56 (1H, dd, *J*1,2 3.4 Hz, *J*2,3 10.1 Hz, H‑2glu), 3.60 (1H, dd, *J*6,6’ 10.4 Hz, *J*6,5 2.1 Hz, H‑6glu), 3.66 (1H, at, *J*9.4 Hz, H-4glu), 3.70 (1H, dd, *J*6,6’ 9.6 Hz, *J*6,5  6.2 Hz, H‑6gal), 3.76 (1H, dd, *J*6’,5 3.6 Hz, H‑6’glu), 3.84 (1H, dd, *J*6’,5  6.5 Hz, H‑6’gal), 3.96 (1H, ddd, *J*5,4 9.8 Hz, H‑5glu), 3.99-4.02 (1H, m, H-5gal), 4.02 (1H, at, *J*9.4 Hz, H-3glu), 4.28-4.31 (2H, m, H-2gal, H-4gal), 4.47, 4.64 (2H, ABq, *J*AB 12.1 Hz, PhCH2), 4.47, 4.83 (2H, ABq, *J*AB 12.1 Hz, PhCH2), 4.60 (1H, dd, *J*3,2 2.3 Hz, *J*3,4 8.0 Hz, H‑3gal), 4.62, 4.83 (2H, ABq, *J*AB 12.2 Hz, PhCH2), 4.82, 4.98 (2H, ABq, *J*AB 11.6 Hz, PhCH2), 5.48 (1H, dd, H-1glu), 5.56 (1H, dd, *J*1,2 4.8 Hz, H-1gal), 7.12–7.39 (20H, m, Ar-H).

C (100.6 MHz, CDCl3) 22.5, 23.2 (2 x t, cyclohexyl-C), 24.3, 25.0 (2 x q, 2 x CH3), 25.3 (t, cyclohexyl-C), 25.9, 26.1 (2 x q, 2 x CH3), 35.6, 35.8 (2 x t, cyclohexyl-C), 55.3 (t, C-6gal), 67.2 (d, C-5gal), 68.7 (t, C-6glu), 70.3, 71.6, 70.7, 71.1 (4 x d, C-5glu, C-3gal, C-4gal, C-2gal), 73.0, 73.4, 75.1, 75.3 (4 x t, 4 x PhCH2), 78.0, 79.5, 81.8, 89.3, 96.3 (5 x d, *C‑*4glu, *C‑*2glu, *C‑*3glu, *C‑*1glu, C-1gal), 102.0 (s, *C‑*1’), 108.3, 109.0 (2 x s, 2 x Me2C), 127.3, 127.5, 127.6, 127.6, 127.7, 127.8, 128.0, 128.3, 128.3, 128.3, 128.4 (11 x d, Ar-CH), 138.0, 138.1, 138.3, 139.0 (4 x s, Ar-C).

m/z (ESI+) 919.43 (M + K+, 18%), 603.43 (M + Na+, 100%), 698.51 (M + NH4+, 13%).

(HRMS Calcd. for C52H68 NO12 (M + NH4+) 898.4742, Found 898.4744).
